# Supplementary material for: Occurrence and Distribution of Per- and Polyfluoroalkyl Substances from Multi-Industry Sources to Water, Sediments and Plants along Nairobi River Basin, Kenya
Source: MDPI journal article supplement (doi:10.3390/ijerph19158980), 2022-07-23
Supplement: s1 [file s1]

**Occurrence and Distribution of Per- and Polyfluoroalkyl Substances from Multi-Industry Sources to Water, Sediments and Plants along Nairobi River Basin, Kenya**

Chirikona Nyangweso Flora<sup>1\*</sup>, Natalia Soares Quinete<sup>2</sup>, Jesleen Gonzalez<sup>2</sup>, Mutua Gershom<sup>1</sup>,  
Kimosop Selly<sup>1</sup>, Orata Francis<sup>1</sup>

<sup>1</sup>Department of Pure and Applied Chemistry, Masinde Muliro University of Science and Technology. P.O Box 190 Kakamega 50100

<sup>2</sup>Department of Chemistry & Biochemistry Institute of Environment, Freshwater Resources Division Florida International University, 3000 NE 151<sup>st</sup> street, Biscayne Bay Campus North Miami, FL33181, USA

\*Corresponding author E-mail: chirikonaflorey@gmail.com.Tel: +254-723789441

**Supplementary information**

**Table S1:** List of 30 PFAS with their internal standards applied for quantitation and list of 24 PFAS in the secondary standard.

| Abbreviation       | Compound Name                                                           | Molecular Formula                                                 | Molecular Weight | I.S.                 | Secondary Standard |
|--------------------|-------------------------------------------------------------------------|-------------------------------------------------------------------|------------------|----------------------|--------------------|
| 4-2 FTS            | Sodium 1H,1H,2H,2H-perfluoro-1-hexanesulfonate                          | C <sub>6</sub> H <sub>5</sub> F <sub>9</sub> O <sub>3</sub> S     | 328.15           | M2 4-2 FTS           | ✓                  |
| 6-2FTS             | Sodium 1H,1H,2H,2H-perfluoro-1-octanesulfonate                          | C <sub>8</sub> H <sub>5</sub> F <sub>13</sub> O <sub>3</sub> S    | 428.17           | M2 6-2FTS            | ✓                  |
| 8-2 FTS            | Sodium 1H,1H,2H,2H-perfluoro-1-decanesulfonate                          | C <sub>10</sub> H <sub>5</sub> F <sub>17</sub> O <sub>3</sub> S   | 528.18           | M2 8-2 FTS           | ✓                  |
| ADONA              | Sodium dodecafluoro-3H-4,8-dioxanonanoate                               | C <sub>10</sub> H <sub>11</sub> N <sub>4</sub> NaO <sub>5</sub> S | 322.27           | M2 6-2FTS            |                    |
| FBSA               | Perfluoro-1-butanesulfonamide                                           | C <sub>4</sub> H <sub>2</sub> F <sub>9</sub> NO <sub>2</sub> S    | 299.11           | M GenX               |                    |
| FHxSA              | Perfluoro-1-hexanesulfonamide                                           | C <sub>6</sub> H <sub>2</sub> F <sub>13</sub> NO <sub>2</sub> S   | 399.13           | M8 PFOA              |                    |
| FOSA               | Perfluoro-1-octanesulfonamide                                           | C <sub>8</sub> H <sub>2</sub> F <sub>17</sub> NO <sub>2</sub> S   | 499.14           | M8 FOSA              |                    |
| HFPO-DA            | 2,3,3,3-Tetrafluoro-2-(1,1,2,2,3,3,3-heptafluoropropoxy)-propanoic acid | C <sub>6</sub> HF <sub>11</sub> O <sub>3</sub>                    | 330.05           | M GenX               |                    |
| N-EtFOSAA          | N-ethylperfluoro-1-octanesulfonamidoacetic acid                         | C <sub>12</sub> H <sub>8</sub> F <sub>17</sub> NO <sub>4</sub> S  | 585.23           | d5 N-EtFOSAA         | ✓                  |
| N-MeFOSAA          | N-methylperfluoro-1-octanesulfonamidoacetic acid                        | C <sub>11</sub> H <sub>6</sub> F <sub>17</sub> NO <sub>4</sub> S  | 571.21           | d3 N-MeFOSAA         | ✓                  |
| PFBA               | Perfluoro-n-butanoic acid                                               | C <sub>4</sub> HF <sub>7</sub> O <sub>2</sub>                     | 214.04           | MPFBA                | ✓                  |
| PFBS               | Potassium perfluoro-1-butanesulfonate                                   | C <sub>4</sub> HF <sub>9</sub> O <sub>3</sub> S                   | 300.10           | M3 PFBS              | ✓                  |
| PFDA               | Perfluoro-n-decanoic acid                                               | C <sub>10</sub> HF <sub>19</sub> O <sub>2</sub>                   | 514.08           | M6 PFDA              | ✓                  |
| PFD <sub>o</sub> A | Perfluoro-n-dodecanoic acid                                             | C <sub>12</sub> HF <sub>23</sub> O <sub>2</sub>                   | 614.10           | M PFD <sub>o</sub> A | ✓                  |
| PFDS               | Sodium perfluoro-1-decanesulfonate                                      | C <sub>10</sub> HF <sub>21</sub> O <sub>3</sub> S                 | 600.14           | M7 PFUdA             | ✓                  |
| PFHpA              | Perfluoro-n-heptanoic acid                                              | C <sub>7</sub> HF <sub>13</sub> O <sub>2</sub>                    | 364.06           | M4 PFHpA             | ✓                  |
| PFHpS              | Sodium perfluoro-1-heptanesulfonate                                     | C <sub>7</sub> HF <sub>15</sub> O <sub>3</sub> S                  | 450.12           | M3 PFHxS             | ✓                  |
| PFHxA              | Perfluoro-n-hexanoic acid                                               | C <sub>6</sub> HF <sub>11</sub> O <sub>2</sub>                    | 314.05           | M5 PFHxA             | ✓                  |
| PFHxS              | Potassium perfluorohexanesulfonate                                      | C <sub>6</sub> HF <sub>13</sub> O <sub>3</sub> S                  | 400.11           | M3 PFHxS             | ✓                  |

|         |                                                           |                       |        |           |   |
|---------|-----------------------------------------------------------|-----------------------|--------|-----------|---|
| PFNA    | Perfluoro-n-nonanoic acid                                 | $C_9HF_{17}O_2$       | 464.08 | M3 PFHxS  | ✓ |
| PFNS    | Sodium perfluoro-1-nonanesulfonate                        | $C_9HF_{19}O_3S$      | 550.14 | M8 PFOS   | ✓ |
| PFOA    | Perfluoro-n-octanoic acid                                 | $C_8HF_{15}O_2$       | 414.07 | M8 PFOA   | ✓ |
| PFONS   | Potassium 9-chlorohexadecafluoro-3-oxanonane-1-sulfonate  | $C_8ClF_{16}KO_4S$    | 570.67 | M8 PFOS   |   |
| PFOS    | Potassium perfluorooctanesulfonate                        | $C_8HF_{17}O_3S$      | 500.13 | M8 PFOS   | ✓ |
| PFOUdS  | Potassium 11-chloroeicosafluoro-3-oxaundecane-1-sulfonate | $C_{10}ClF_{20}KO_4S$ | 670.69 | M PFDoA   |   |
| PFPeA   | Perfluoro-n-pentanoic acid                                | $C_5HF_9O_2$          | 264.05 | M5 PFPeA  | ✓ |
| PFPeS   | Sodium perfluoro-1-pentanesulfonate Potassium             | $C_5HF_{11}O_3S$      | 350.11 | M GenX    | ✓ |
| PFTeDA  | Perfluoro-n-tetradecanoic acid                            | $C_{14}HF_{27}O_2$    | 714.11 | M2 PFTeDA | ✓ |
| PFTTrDA | Perfluoro-n-tridecanoic acid                              | $C_{13}HF_{25}O_2$    | 664.11 | M2 PFTeDA | ✓ |
| PFUdA   | Perfluoro-n-undecanoic acid                               | $C_{11}HF_{21}O_2$    | 564.09 | M7 PFUdA  | ✓ |

**Table S2:** The LC gradient conditions

| Time (Min) | A [%] | B % | Flow mL/min |
|------------|-------|-----|-------------|
| 0.00       | 90    | 10  | 0.4         |
| 8.00       | 5     | 95  | 0.4         |
| 11.00      | 5     | 95  | 0.4         |
| 12.00      | 90    | 10  | 0.4         |

**Table S3** Ms parameters for LC- MS/MS Analysis

| Parameters                      | Settings           |
|---------------------------------|--------------------|
| Ms Aquisition                   | Dynamic MRM        |
| Cycle time                      | 500 ms             |
| Ion source                      | ESI negative       |
| Drying gas Temperature and Flow | 150 0c and 10L/Min |
| Sheath gas temperature and flow | 300 and 10L/Min    |
| Capillary                       | 2000               |
| Nozzle Voltage                  | 0 V                |

**Table S4.** Summary of the MRM method for the analysis of PFAS

| Compound Name | IST D | Precursor Ion | Product Ions | Retention Time (min) | Delta Retention Time | Fragmentor | Collision Energy | Cell Accelerator Voltage |
|---------------|-------|---------------|--------------|----------------------|----------------------|------------|------------------|--------------------------|
| 4-2 FTS       |       | 327           | 80.9         | 5.69                 | 3                    | 125        | 32               | 5                        |
| 6-2FTS        |       | 427           | 406.8; 79.9  | 6.95                 | 3                    | 125        | 24               | 5                        |
| 8-2 FTS       |       | 527           | 506.8; 80.9  | 7.65                 | 3                    | 170        | 28               | 5                        |
| Adona         |       | 377           | 250.9        | 6.54                 | 3                    | 70         | 10               | 5                        |
| d3 N-MeFOSAA  | ✓     | 573           | 419          | 8.1                  | 3                    | 115        | 20               | 5                        |
| d5 N-EtFOSAA  | ✓     | 589           | 419          | 8.18                 | 3                    | 115        | 20               | 5                        |
| FBSA          |       | 298           | 77.9         | 6.83                 | 3                    | 100        | 28               | 5                        |
| FHxSA         |       | 398           | 77.9         | 7.95                 | 3                    | 100        | 28               | 5                        |
| FOSA          |       | 497.9         | 77.9         | 8.63                 | 3                    | 125        | 36               | 5                        |
| GenX          |       | 285           | 169          | 5.88                 | 3                    | 108        | 12               | 5                        |
| M GenX        | ✓     | 287           | 185          | 5.88                 | 3                    | 108        | 20               | 5                        |
| M PFDoA       | ✓     | 615           | 570          | 8.21                 | 3                    | 79         | 8                | 5                        |
| M2 4-2 FTS    | ✓     | 329           | 81           | 5.66                 | 3                    | 125        | 28               | 5                        |
| M2 6-2FTS     | ✓     | 429           | 81           | 6.94                 | 3                    | 125        | 32               | 5                        |
| M2 8-2 FTS    | ✓     | 529           | 81           | 7.66                 | 3                    | 170        | 36               | 5                        |
| M2 PFTeDA     | ✓     | 715           | 670          | 8.72                 | 5                    | 100        | 13               | 5                        |
| M3 PFBS       | ✓     | 302           | 99           | 4.99                 | 3                    | 100        | 33               | 5                        |
| M3 PFHxS      | ✓     | 402           | 99           | 6.57                 | 3                    | 100        | 41               | 5                        |
| M4 PFHpA      | ✓     | 367           | 322          | 6.52                 | 3                    | 72         | 8                | 5                        |
| M5 PFHxA      | ✓     | 318           | 273          | 5.79                 | 3                    | 70         | 8                | 5                        |
| M5 PFPeA      | ✓     | 268           | 223          | 4.35                 | 3                    | 60         | 4                | 5                        |
| M6 PFDA       | ✓     | 519           | 474          | 7.7                  | 3                    | 81         | 8                | 5                        |
| M7 PFUDa      | ✓     | 570           | 525          | 7.98                 | 3                    | 73         | 8                | 5                        |
| M8 FOSA       | ✓     | 506           | 78           | 8.63                 | 3                    | 125        | 36               | 5                        |

|           |   |       |              |      |   |     |    |   |
|-----------|---|-------|--------------|------|---|-----|----|---|
| M8 PFOA   | ✓ | 421   | 376          | 7.01 | 3 | 69  | 8  | 5 |
| M8 PFOS   | ✓ | 507   | 99           | 7.37 | 3 | 100 | 46 | 5 |
| M9 PFNA   | ✓ | 472   | 427          | 7.39 | 3 | 66  | 8  | 5 |
| MPFBA     | ✓ | 217   | 172          | 2.18 | 3 | 60  | 8  | 5 |
| N-EtFOSAA |   | 584   | 525.9; 418.9 | 8.18 | 3 | 115 | 20 | 5 |
| N-MeFOSAA |   | 570   | 482.9;418.9  | 8.09 | 3 | 115 | 16 | 5 |
| PFBA      |   | 213   | 168.9        | 2.18 | 3 | 60  | 8  | 5 |
| PFBS      |   | 298.9 | 98.9;80      | 4.98 | 3 | 100 | 33 | 5 |
| PFDA      |   | 513   | 469          | 7.7  | 3 | 81  | 8  | 5 |
| PFDoA     |   | 613   | 569; 268.7   | 8.21 | 3 | 79  | 8  | 5 |
| PFDS      |   | 598.9 | 99           | 7.93 | 3 | 100 | 56 | 5 |
| PFDS      |   | 598.9 | 80           | 7.93 | 3 | 100 | 88 | 5 |
| PFHpA     |   | 362.9 | 319; 169     | 6.52 | 3 | 72  | 5  | 5 |
| PFHpS     |   | 448.9 | 98.7; 79.7   | 7.01 | 3 | 100 | 44 | 5 |
| PFHxA     |   | 313   | 268.9        | 5.79 | 3 | 70  | 4  | 5 |
| PFHxS     |   | 398.9 | 99;80        | 6.56 | 3 | 100 | 41 | 5 |
| PFNA      |   | 463   | 419;169      | 7.39 | 3 | 66  | 8  | 5 |
| PFNS      |   | 548.9 | 98.9; 79.9   | 7.67 | 3 | 165 | 48 | 5 |
| PFOA      |   | 413   | 369;169      | 7.01 | 3 | 69  | 8  | 5 |
| PFONS     |   | 530.9 | 350.9        | 7.44 | 3 | 100 | 17 | 5 |
| PFOS      |   | 498.9 | 99; 80       | 7.37 | 3 | 100 | 46 | 5 |
| PFOUDS    |   | 630.9 | 450.9        | 7.97 | 3 | 100 | 17 | 5 |
| PFPeA     |   | 263   | 218.9        | 4.3  | 3 | 60  | 4  | 5 |
| PFPeS     |   | 348.9 | 98.9;79.9    | 5.97 | 3 | 135 | 36 | 5 |
| PFTeDA    |   | 713   | 669;169      | 8.6  | 3 | 100 | 13 | 5 |
| PFTTrDA   |   | 663   | 619;169      | 8.41 | 3 | 91  | 9  | 5 |
| PFUdA     |   | 563   | 519          | 7.97 | 3 | 73  | 8  | 5 |
| 4-2 FTS   |   | 327   | 306.9        | 5.69 | 3 | 125 | 20 | 5 |

**Table S5.** Method Validation results for PFAS.

| <b>Compounds</b> | <b>MDL (ng/L) water</b> | <b>MDL (ng/g) sediments and plants</b> |
|------------------|-------------------------|----------------------------------------|
| PFBA             | 0.001                   | 0.1                                    |
| FBSA             | 0.01                    | 0.1                                    |
| PFBS             | 0.01                    | 0.2                                    |
| PFPeA            | 0.05                    | 2                                      |
| PFPeS            | 0.003                   | 0.4                                    |
| PFHxA            | 0.01                    | 0.4                                    |
| FHxSA            | 0.02                    | 0.4                                    |
| PFHxS            | 0.01                    | 0.1                                    |
| 4-2 FTS          | 0.03                    | 0.4                                    |
| Adona            | 0.01                    | 0.4                                    |
| GenX             | 0.03                    | 0.1                                    |
| PFHpA            | 0.08                    | 0.2                                    |
| PFHpS            | 0.04                    | 0.4                                    |
| PFOA             | 0.01                    | 0.2                                    |
| FOSA             | 0.03                    | 0.2                                    |
| PFOS             | 0.01                    | 0.2                                    |
| 6-2 FTS          | 0.22                    | 0.1                                    |
| PFONS            | 0.01                    | 0.4                                    |
| PFNA             | 0.02                    | 0.1                                    |
| N-MeFOSAA        | 0.49                    | 0.2                                    |
| N-EtFOSAA        | 0.27                    |                                        |
| PFNS             | 0.01                    | 0.2                                    |
| PFDA             | 0.02                    | 0.1                                    |
| PFDS             | 0.09                    |                                        |
| 8-2 FTS          | 0.002                   | 1                                      |
| PFUdA            | 0.21                    | 1                                      |
| PFDoA            | 0.04                    |                                        |
| PFTTrDA          | 0.54                    | 0.4                                    |

**Table S6.** PFAS abbreviation list. Long chain PFAS are characterized by a carbon chain greater than or equal to 8 whereas with short-chain PFAS are defined as the ones with a carbon chain less than 8.

| Compound Class                               | Compound Name           | Abbreviation | Structure                           | Chain Length |
|----------------------------------------------|-------------------------|--------------|-------------------------------------|--------------|
| <b>Perfluoroalkyl carboxylic acid (PFCA)</b> | Perfluorobutanoic acid  | PFBA         | C <sub>3</sub> F <sub>7</sub> COOH  | Short        |
|                                              | Perfluoropentanoic acid | PFPeA        | C <sub>4</sub> F <sub>9</sub> COOH  | Short        |
|                                              | Perfluorohexanoic acid  | PFHxA        | C <sub>5</sub> F <sub>11</sub> COOH | Short        |
|                                              | Perfluoroheptanoic acid | PFHpA        | C <sub>6</sub> F <sub>13</sub> COOH | Short        |
|                                              | Perfluorooctanoic acid  | PFOA         | C <sub>7</sub> F <sub>15</sub> COOH | Long         |
|                                              | Perfluorononanoic acid  | PFNA         | C <sub>8</sub> F <sub>17</sub> COOH | Long         |
|                                              | Perfluorodecanoic acid  | PFDA         | C <sub>9</sub> F <sub>19</sub> COOH | Long         |



|                                                |                                |         |                                                  |       |
|------------------------------------------------|--------------------------------|---------|--------------------------------------------------|-------|
|                                                | Perfluoroundecanoic acid       | PFUdA   | C <sub>10</sub> F <sub>21</sub> COOH             | Long  |
|                                                | Perfluorododecanoic acid       | PFDdA   | C <sub>11</sub> F <sub>23</sub> COOH             | Long  |
|                                                | Perfluorotridecanoic acid      | PFTTrDA | C <sub>12</sub> F <sub>25</sub> COOH             | Long  |
|                                                | Perfluorotetradecanoic acid    | PFTeDA  | C <sub>13</sub> F <sub>27</sub> COOH             | Long  |
| <b>Perfluoroalkyl<br/>sulfonic acid (PFSA)</b> | Perfluorobutane sulfonic acid  | PFBS    | C <sub>4</sub> F <sub>9</sub> SO <sub>3</sub> H  | Short |
|                                                | Perfluoropentane sulfonic acid | PFPeS   | C <sub>5</sub> F <sub>11</sub> SO <sub>3</sub> H | Short |
|                                                | Perfluorohexane sulfonic acid  | PFHxS   | C <sub>6</sub> F <sub>13</sub> SO <sub>3</sub> H | Short |
|                                                | Perfluoroheptane sulfonic acid | PFHpS   | C <sub>7</sub> F <sub>15</sub> SO <sub>3</sub> H | Short |
|                                                | Perfluorooctane sulfonic acid  | PFOS    | C <sub>8</sub> F <sub>17</sub> SO <sub>3</sub> H | Long  |

|                                               |                                       |         |                        |       |
|-----------------------------------------------|---------------------------------------|---------|------------------------|-------|
|                                               | Perfluorononane sulfonic acid         | PFNS    | $C_9F_{19}SO_3H$       | Long  |
|                                               | Perfluorodecane sulfonic acid         | PFDS    | $C_{10}F_{21}SO_3H$    | Long  |
| <b>Fluorotelomer sulfonic acid (FTS)</b>      | 4:2 Fluorotelomer sulfonic acid       | 4-2 FTS | $C_4F_9C_2H_4SO_3H$    | Short |
|                                               | 6:2 Fluorotelomer sulfonic acid       | 6-2 FTS | $C_6F_{13}C_2H_4SO_3H$ | Long  |
|                                               | 8:2 Fluorotelomer sulfonic acid       | 8-2 FTS | $C_8F_{17}C_2H_4SO_3H$ | Long  |
| <b>Perfluoroether carboxylic acid (PFECA)</b> | Perfluoro-2-methyl-3-oxahexanoic acid | GenX    | $C_6F_{11}O_3H$        | Short |
|                                               | 4,8-Dioxa-3H-perfluorononanoic acid   | Adona   | $C_7H_2F_{12}O_4$      | Short |

|                                                                |                                                     |                    |                                                                                          |       |
|----------------------------------------------------------------|-----------------------------------------------------|--------------------|------------------------------------------------------------------------------------------|-------|
| <b>Perfluoroalkane<br/>sulfonamido acetic<br/>acid (FOSAA)</b> | N-Methyl perfluorooctane<br>sulfonamido acetic acid | N-MeFOSAA          | $\text{C}_8\text{F}_{17}\text{SO}_2\text{N}[\text{CH}_3]\text{CH}_2\text{COOH}$          | Long  |
|                                                                | N-Ethyl perfluorooctane sulfonamido<br>acetic acid  | N-EtFOSAA          | $\text{C}_8\text{F}_{17}\text{SO}_2\text{N}[\text{C}_2\text{H}_5]\text{CH}_2\text{COOH}$ | Long  |
| <b>Perfluoroalkane<br/>sulfonamide<br/>(PFOSA)</b>             | Perfluorobutanesulfonamide                          | FBSA               | $\text{C}_4\text{F}_9\text{SO}_2\text{NH}_2$                                             | Short |
|                                                                | Perfluorohexanesulfonamide                          | FH <sub>x</sub> SA | $\text{C}_6\text{F}_{13}\text{SO}_2\text{NH}_2$                                          | Short |
|                                                                | Perfluorooctanesulfonamide                          | FOSA               | $\text{C}_8\text{F}_{17}\text{SO}_2\text{NH}_2$                                          | Long  |

Table S7: Range, mean, total concentration and the detection frequency of PFAS in water in the eight sampling points along the Nairobi River.

| PFAS               | Range        | Mean | Total ng/L | Detection frequency |
|--------------------|--------------|------|------------|---------------------|
| PFBA               | 0.74-4.79    | 1.69 | 13.52      | 100%                |
| PFPeA              | 0.28-3.92    | 1.13 | 9.07       | 100%                |
| PFBS               | 0.01- 1.0    | 0.15 | 1.23       | 100%                |
| 4-2 FTS            | 0.01- 0.05   | 0.02 | 0.18       | 100%                |
| PFHxA              | 0.15- 3.0    | 0.74 | 5.9        | 100%                |
| PFPeS              | 0.05- 0.11   | 0.06 | 0.12       | 25%                 |
| GenX               | 0.01- 0. 12  | 0.06 | 0.53       | 100%                |
| PFHpA              | 0.13- 2.41   | 0.60 | 4.80       | 100%                |
| Adona              | <LOD- 0.01   | 0.01 | 0.02       | 50%                 |
| PFHxS              | <LOD- 0.47   | 0.11 | 0.11       | 62.5%               |
| FBSA               | 0.01- 0.06   | 0.03 | 0.23       | 100%                |
| 6 – 2 FTS          | 0.77- 5.53   | 3.66 | 29.31      | 100%                |
| PFOA               | 0.16- 3.01   | 0.74 | 5.90       | 100%                |
| PFHpS              | <LOD- 0.01   | 0.01 | 0.01       | 75%                 |
| PFOS               | 0.01-1.37    | 0.23 | 1.83       | 100%                |
| PFNA               | 0.06- 1.39   | 0.34 | 2.69       | 100%                |
| PFONs              | <LOD- 0.02   | 0.01 | 0.06       | 75%                 |
| PFNs               | <LOD- 0.09   | 0.01 | 0.01       | 12.5%               |
| 8-2 FTs            | 0.02- 30.11  | 0.03 | 0.24       | 100%                |
| PFDA               | 0.04- 0.67   | 0.19 | 1.50       | 100%                |
| PFDS               | 0.01- 1.30   | 0.22 | 1.78       | 100%                |
| PFOUDS             | <LOD- 0.38   | 0.15 | 0.50       | 37.5%               |
| PFUdA              | 0.05- 13. 22 | 4.9  | 39.19      | 100%                |
| FH <sub>x</sub> SA | 0.002-0.013  | 0.01 | 0.06       | 87.5%               |
| N-MeFOSAA          | <LOD-0.22    | 0.06 | 0.39       | 87.5%               |

|                     |            |       |       |       |
|---------------------|------------|-------|-------|-------|
| N-EtFOSAA           | <LOD-0.24  | 0.06  | 0.31  | 37.5% |
| PFD <sub>o</sub> A  | 0.03- 2.40 | 0.76  | 6.06  | 100%  |
| PFT <sub>r</sub> DA | <LOD-0.02  | 0.001 | 0.02  | 87.5% |
| PFT <sub>e</sub> DA | <LOD-0.54  | 0.31  | 2.17  | 75%   |
| FOSA                | 0.01-0.1   | 0.04  | 0.023 | 100%  |

Table S8: Range, mean, total concentration and the detection frequency of PFAS in sediments

| PFAS      | Range        | Mean | Total ng/g | Detection frequency |
|-----------|--------------|------|------------|---------------------|
| PFBA      | 0.55 - 5.47  | 2.85 | 22.81      | 100%                |
| PFPeA     | 1.58 - 10.91 | 4.75 | 37.98      | 100%                |
| PFBS      | 0.12 - 6.18  | 2.0  | 16.01      | 100%                |
| 4-2 FTS   | < MDL        | 0.00 | 0.00       | 0%                  |
| PFHxA     | 0.46 - 1.50  | 0.81 | 6.51       | 100%                |
| PFHxS     | 0 - 3.70     | 1.49 | 10.42      | 85.5%               |
| PFHpA     | 0.17- 0.84   | 0.42 | 3.40       | 100%                |
| ADONA     | 0 - 0.77     | 0.25 | 1.49       | 75%                 |
| 6-2 FTS   | 1.62         | 1.62 | 1.62       | 12.5%               |
| PFHpS     | 1.69         | 1.69 | 1.69       | 12.5%               |
| PFOA      | 0.88 - 13.60 | 4.95 | 39.62      | 100%                |
| FBSA      | 0- 0.21      | 0.17 | 1.19       | 85.5%               |
| PFOS      | 2.44- 11.74  | 5.15 | 41.16      | 100%                |
| PFONS     | 0 - 0.2741   | 0.20 | 0.80       | 50%                 |
| PFNA      | 0.053 -1.05  | 0.40 | 3.16       | 100%                |
| PFNS      | 0 -7.17      | 5.17 | 31.03      | 75%                 |
| 8-2 FTS   | 0.03- 0.87   | 0.36 | 2.88       | 100%                |
| PFDA      | 0.47- 3.76   | 1.43 | 11.43      | 100%                |
| PFDS      | 1.55         | 1.56 | 1.56       | 12.5%               |
| PFOUDS    | 0.20- 0.36   | 0.26 | 0.52       | 25%                 |
| PFUdA     | 0.33- 1.65   | 1.00 | 8.01       | 100%                |
| FHxSA     | 0- 0.02      | 0.09 | 0.68       | 100%                |
| PFDoA     | 0.30- 1.35   | 0.79 | 6.31       | 100%                |
| N.MeFOSAA | 0.52 -1.66   | 1.00 | 8.03       | 100%                |
| N-EtFOSAA | 0.44- 1.51   | 0.87 | 6.94       | 100%                |
| PFTTrDA   | 0.21- 1.01   | 0.41 | 3.31       | 100%                |
| PFTeDA    | 0.10- 0.75   | 0.40 | 3.18       | 100%                |
| FOSA      | 0- 0.60      | 0.39 | 3.17       | 100%                |

Table S9: Range, mean, total concentration and the detection frequency of PFAS in plants

| PFAS      | Range       | Mean   | Total | Detection frequency |
|-----------|-------------|--------|-------|---------------------|
| PFBA      | <MDL- 15    | 4.71   | 28.23 | 83.33%              |
| PFPeA     | 2.75 -9.00  | 5.41   | 32.47 | 100%                |
| PFBS      | <MDL -2.3   | 0.11   | 0.71  | 83.33%              |
| 4-2 FTS   | <MDL- 0.8   | 0.13   | 0.80  | 16.67%              |
| PFHxA     | <MDL- 2.8   | 0.87   | 5.21  | 83.33%              |
| PFHxS     | <MDL- 2.04  | 0.85   | 3.79  | 33.33%              |
| PFHpA     | 0.20-1.14   | 0.61   | 3.67  | 100%                |
| ADONA     | <MDL- 0.12  | 0.11   | 0.14  | 33.33%              |
| 6-2 FTS   | <MDL-2.90   | 0.48   | 2.90  | 16.67%              |
| PFHpS     | <MDL        | 0      | 0     | 0%                  |
| PFOA      | 2.85- 5.60  | 4.89   | 29.33 | 100%                |
| FBSA      | <MDL – 0.19 | 0.03   | 0.19  | 16.67%              |
| PFOS      | 0.02- 2.66  | 0.95   | 5.68  | 100%                |
| PFONS     | <MDL – 0.21 | 0.09   | 0.56  | 50%                 |
| PFNA      | <MDL – 1.04 | 0.26   | 1.53  | 33.33%              |
| PFNS      | <MDL- 0.53  | 0.09   | 0.54  | 16.67%              |
| 8-2FTS    | <MDL -0.86  | 0.24   | 1.45  | 16.67%              |
| PFDA      | <MDL -1.29  | 0.41   | 2.48  | 83.33%              |
| PFDS      | <MDL- 0.91  | 0.15   | 0.91  | 16.67%              |
| PFOUDS    | <MDL        | 0      | 0     | 0                   |
| PFUdA     | <MDL -1.32  | 0.38   | 2.25  | 66.67%              |
| FHxSA     | <MDL – 0.12 | 0.02   | 0.12  | 16.67%              |
| PFDoA     | 0.05 – 0.37 | 0.20   | 1.22  | 100%                |
| N.MeFOSAA | <MDL-0.20   | 0.28   | 1.67  | 66.67%              |
| N-EtFOSAA | <MDL -0.003 | 0.0004 | 0.003 | 16.67%              |
| PFTTrDA   | <MDL- 1.92  | 0.42   | 2.53  | 66.67%              |
| PFTeDA    | <MDL- 0.20  | 0.12   | 0.71  | 83.33%              |
| FOSA      | <MDL- 1.02  | 0.17   | 1.02  | 16.67%              |
